# Supplementary material
Source: publisher site journal article supplement (https://www.dovepress.com/article/475959)
Supplement: Supplementary file 1 [file get_supplementary_file.php]

Table S1. Primers for quantitative real-time PCR.

| Target gene | Forward | Reverse |
| --- | --- | --- |
| TNF-α | GTGCTTGTTCCTCAGCCTCT | ATGGGCTACAGGCTTGTCAC |
| IL-1β | CCAGCTACGAATCTCCGACC | TCGTGCACATAAGCCTCGTT |
| IL-6 | AGAGGCACTGGCAGAAAACA | GCTCTGGCTTGTTCCTCACT |
| CCNE1 | AGAGGAAGGCAAACGTGACC | GCTTGCACGTTGAGTTTGGG |
| ERBB2 | GCAGGATATCCAGGAGGTGC | AGGGGTGGTATTGTTCAGCG |
| JAK2 | CCGATCTGTGTAGCCGGTTT | TCTGTCATCGTAAGGCAGGC |
| NOS3 | CAGCACATTTGGGAATGGGG | AGGACACCAGTGGGTCTGAG |
| PI3K | GCAGCCAGGCTTCATATTCC | GCAGTTGTCCTCTCTCAGCA |
| PKN1 | GTGGGAGATGAGCTGTGGG | GACCTGGTTCGAATGCAAAG |
| RXRA | ACATTTCCTGCCGCTCGATT | CTGATGACCGAGAAAGGCGG |
| GAPDH | GTCAAGGCTGAGAACGGGAA | AAATGAGCCCCAGCCTTCTC |
